# Supplementary material
Source: MDPI journal article supplement (https://www.mdpi.com/2073-4395/12/2/419)

## SUPPLEMENTARY MATERIAL

Table S1. Test data for an atomizer with a fan blade angle of 35°

| Fan blade angle of 35° |          |               |               |               |                                 |                        |               |               |               |                                 |
|------------------------|----------|---------------|---------------|---------------|---------------------------------|------------------------|---------------|---------------|---------------|---------------------------------|
| Flow rate = 5.0 L/min  |          |               |               |               |                                 | Flow rate = 10.8 L/min |               |               |               |                                 |
| Wind speed $v$         | Traction | $D_{v,1}$     | $D_{v,5}$     | $D_{v,9}$     | Droplet distribution span $R_s$ | Power FV               | $D_{v,1}$     | $D_{v,5}$     | $D_{v,9}$     | Droplet distribution span $R_s$ |
| m/s                    | N        | $\mu\text{m}$ | $\mu\text{m}$ | $\mu\text{m}$ | -                               | W                      | $\mu\text{m}$ | $\mu\text{m}$ | $\mu\text{m}$ | -                               |
| 50.11                  | 31.6     | 34.11         | 119.2         | 222.1         | 1.343                           | 1583.476               | 43.09         | 136.1         | 285.5         | 1.537                           |
| 50.46                  | 31.8     | 33.1          | 118.9         | 214.2         | 1.346                           | 1604.628               | 39.28         | 124.9         | 280.9         | 1.495                           |
| 50.82                  | 32.0     | 34.53         | 116.32        | 225.36        | 1.347                           | 1626.24                | 37.13         | 121.8         | 275.5         | 1.572                           |
| 51.18                  | 32.2     | 34.0          | 115.4         | 213.2         | 1.380                           | 1647.996               | 37.72         | 118.4         | 259.9         | 1.519                           |
| 51.54                  | 32.6     | 33.76         | 113.9         | 205.6         | 1.347                           | 1680.204               | 36.19         | 121.9         | 255.3         | 1.500                           |
| 51.9                   | 32.8     | 32.41         | 112.4         | 211.2         | 1.347                           | 1702.32                | 38.11         | 126.1         | 255.6         | 1.500                           |
| 52.27                  | 33.2     | 31.73         | 110.9         | 211.2         | 1.358                           | 1735.364               | 35.97         | 110.4         | 266.2         | 1.540                           |
| 52.63                  | 34.0     | 32.21         | 113.4         | 194.2         | 1.351                           | 1789.42                | 36.27         | 117.2         | 255.2         | 1.537                           |
| 53                     | 34.2     | 30.77         | 112.9         | 216.3         | 1.363                           | 1812.6                 | 36.25         | 113           | 244.4         | 1.491                           |
| 53.37                  | 34.6     | 30.54         | 110.5         | 205.0         | 1.352                           | 1846.602               | 34.15         | 110.5         | 235.4         | 1.577                           |
| 53.73                  | 35.2     | 30.1          | 109.48        | 194.3         | 1.364                           | 1891.296               | 36.38         | 117.2         | 235.7         | 1.498                           |
| 54.1                   | 35.6     | 29.5          | 108.4         | 201.48        | 1.359                           | 1925.96                | 34.24         | 106.9         | 222.2         | 1.508                           |
| 54.46                  | 36.0     | 29.05         | 106.8         | 200.5         | 1.369                           | 1960.56                | 34.66         | 111.2         | 240.6         | 1.522                           |
| 54.83                  | 36.4     | 30.34         | 105.5         | 198.6         | 1.365                           | 1995.812               | 34.7          | 112.4         | 239.6         | 1.503                           |
| 55.2                   | 36.8     | 27.25         | 104.2         | 197.0         | 1.370                           | 2031.36                | 34.43         | 107.6         | 211.1         | 1.516                           |
| 55.56                  | 37.2     | 29.01         | 104.8         | 196.5         | 1.381                           | 2066.832               | 34.15         | 113.1         | 216.3         | 1.515                           |
| 55.93                  | 37.8     | 27.6          | 104.2         | 194.3         | 1.383                           | 2114.154               | 31.53         | 105.9         | 218.6         | 1.535                           |
| 56.3                   | 38.2     | 26.52         | 103.5         | 190.5         | 1.379                           | 2150.66                | 31.09         | 100.5         | 210.5         | 1.516                           |
| 56.66                  | 38.8     | 28.08         | 103.8         | 188.4         | 1.373                           | 2198.408               | 32.74         | 103.9         | 223.6         | 1.609                           |
| 57.02                  | 39.4     | 26.6          | 104.2         | 189.54        | 1.378                           | 2246.588               | 32.31         | 104.0         | 211.5         | 1.512                           |
| 57.39                  | 40.0     | 26.5          | 102.2         | 186.7         | 1.376                           | 2295.6                 | 32.14         | 104.9         | 217.9         | 1.516                           |
| 57.75                  | 40.2     | 26.32         | 101           | 188.3         | 1.384                           | 2321.55                | 31.96         | 102.9         | 206.6         | 1.524                           |
| 58.12                  | 40.6     | 26.01         | 100.8         | 185.5         | 1.383                           | 2359.672               | 31.05         | 98.66         | 206.1         | 1.518                           |
| 58.49                  | 41.0     | 26.35         | 100.5         | 186.3         | 1.38                            | 2398.09                | 32.14         | 101.8         | 209.2         | 1.525                           |
| 58.85                  | 41.6     | 27.21         | 99.1          | 180.3         | 1.385                           | 2448.16                | 31.57         | 101.0         | 204.7         | 1.518                           |
| 59.21                  | 42.4     | 26.15         | 99.5          | 183.2         | 1.379                           | 2510.504               | 32.95         | 98.1          | 199.6         | 1.515                           |
| 59.58                  | 42.8     | 25.86         | 98.1          | 176.0         | 1.382                           | 2550.024               | 30.92         | 106.1         | 199.4         | 1.549                           |
| 59.95                  | 43.2     | 25.71         | 97.7          | 179.6         | 1.382                           | 2589.84                | 31.65         | 107.0         | 192.1         | 1.531                           |
| 60.31                  | 43.6     | 25.41         | 97.1          | 178.3         | 1.385                           | 2629.516               | 30.61         | 103.2         | 195.2         | 1.563                           |
| 60.68                  | 44.0     | 25.1          | 96.8          | 176.5         | 1.384                           | 2669.92                | 29.6          | 101.4         | 197.5         | 1.543                           |
| 61.05                  | 44.4     | 24.98         | 96.6          | 175.0         | 1.379                           | 2710.62                | 27.24         | 103.0         | 191.3         | 1.552                           |
| 61.41                  | 45.2     | 24.65         | 95.1          | 173.2         | 1.387                           | 2775.732               | 26.67         | 102.7         | 192.5         | 1.527                           |

\*  $D_{v,1}$ ,  $D_{v,5}$ , and  $D_{v,9}$  are the droplet diameters such that 10, 50, and 90 percent, respectively, of the spray volume is in droplets of smaller diameter.  $D_{v,1}$  is the droplet diameter where 10% of the spray volume is contained in droplets smaller than this value.  $D_{v,9}$  is the droplet diameter where 90% of the spray volume is contained in droplets smaller than this value.

Table S2. Test data for an atomizer with a fan blade angle of 45°

| Fan blade angle of 45° |          |           |           |           |                                       |             |                        |           |           |                                       |
|------------------------|----------|-----------|-----------|-----------|---------------------------------------|-------------|------------------------|-----------|-----------|---------------------------------------|
| Flow rate = 5.0 L/min  |          |           |           |           |                                       | Power<br>FV | Flow rate = 10.8 L/min |           |           |                                       |
| Wind<br>speed<br>$v$   | Traction | $D_{v,1}$ | $D_{v,5}$ | $D_{v,9}$ | Droplet<br>distribution<br>span $R_s$ |             | $D_{v,1}$              | $D_{v,5}$ | $D_{v,9}$ | Droplet<br>distribution<br>span $R_s$ |
| m/s                    | N        | μm        | μm        | μm        | -                                     | W           | μm                     | μm        | μm        | -                                     |
| 50.11                  | 30.4     | 54.35     | 144.9     | 277.1     | 1.537                                 | 1523.344    | 55.26                  | 152.5     | 315.5     | 1.573                                 |
| 50.46                  | 30.6     | 53.28     | 141.6     | 264.8     | 1.495                                 | 1544.076    | 55.26                  | 153.3     | 310.9     | 1.654                                 |
| 50.82                  | 31.2     | 53.35     | 143.5     | 278.9     | 1.572                                 | 1585.584    | 54.47                  | 151.8     | 305.3     | 1.653                                 |
| 51.18                  | 31.4     | 52.28     | 139.1     | 263.6     | 1.519                                 | 1607.052    | 52.77                  | 145.4     | 289.9     | 1.576                                 |
| 51.54                  | 31.6     | 51.11     | 136.3     | 255.6     | 1.500                                 | 1628.664    | 52.32                  | 145.7     | 285.3     | 1.566                                 |
| 51.9                   | 31.8     | 50.69     | 135.9     | 254.5     | 1.500                                 | 1650.42     | 53.24                  | 141.7     | 285.6     | 1.574                                 |
| 52.27                  | 32.2     | 50.87     | 136.6     | 261.2     | 1.540                                 | 1683.094    | 51.13                  | 143.8     | 286.2     | 1.635                                 |
| 52.63                  | 32.6     | 50.32     | 134.6     | 257.2     | 1.537                                 | 1715.738    | 49.84                  | 138.5     | 270.6     | 1.593                                 |
| 53.0                   | 33.0     | 49.17     | 130.8     | 244.2     | 1.491                                 | 1749        | 49.33                  | 137.8     | 266.5     | 1.575                                 |
| 53.37                  | 33.4     | 48.99     | 131.5     | 256.3     | 1.577                                 | 1782.558    | 48.2                   | 135.1     | 265.7     | 1.610                                 |
| 53.73                  | 33.8     | 48.05     | 127.7     | 239.2     | 1.498                                 | 1816.074    | 48.39                  | 134.7     | 264.8     | 1.606                                 |
| 54.1                   | 34.2     | 47.13     | 127.0     | 238.7     | 1.508                                 | 1850.22     | 47.33                  | 131.5     | 252.2     | 1.558                                 |
| 54.46                  | 34.6     | 16.61     | 125.7     | 238       | 1.522                                 | 1884.316    | 47.49                  | 134.9     | 281.6     | 1.565                                 |
| 54.83                  | 35.0     | 46.07     | 123.6     | 231.8     | 1.503                                 | 1919.05     | 47.62                  | 133.5     | 279.6     | 1.581                                 |
| 55.20                  | 35.4     | 46.04     | 122.6     | 232       | 1.516                                 | 1954.08     | 46.13                  | 129       | 241.1     | 1.588                                 |
| 55.56                  | 35.8     | 45.04     | 120.9     | 228.3     | 1.515                                 | 1989.048    | 45.47                  | 126.8     | 246.3     | 1.583                                 |
| 55.93                  | 36.2     | 44.53     | 120.0     | 229.9     | 1.535                                 | 2024.666    | 44.4                   | 127       | 248.6     | 1.608                                 |
| 56.30                  | 36.6     | 44.63     | 121.2     | 234.4     | 1.516                                 | 2060.58     | 44.59                  | 124.35    | 240.5     | 1.574                                 |
| 56.66                  | 37.0     | 44.54     | 120.0     | 237.6     | 1.609                                 | 2096.42     | 45.89                  | 131       | 288.7     | 1.654                                 |
| 57.02                  | 37.4     | 43.27     | 117.8     | 225.7     | 1.512                                 | 2132.548    | 43.55                  | 122.5     | 241.5     | 1.616                                 |
| 57.39                  | 37.8     | 12.89     | 115.2     | 215.8     | 1.516                                 | 2169.342    | 44.13                  | 124.7     | 247.9     | 1.634                                 |
| 57.75                  | 38.4     | 42.59     | 114.9     | 216.8     | 1.524                                 | 2217.6      | 42.94                  | 120.5     | 236.6     | 1.607                                 |
| 58.12                  | 39.0     | 42.24     | 113.8     | 215.7     | 1.518                                 | 2266.68     | 42.05                  | 119.5     | 236.1     | 1.624                                 |
| 58.49                  | 39.4     | 41.9      | 112.9     | 213.36    | 1.525                                 | 2304.506    | 42.84                  | 121       | 239.2     | 1.605                                 |
| 58.85                  | 39.8     | 41.39     | 110.9     | 210.5     | 1.518                                 | 2342.23     | 42.26                  | 119.3     | 234.7     | 1.613                                 |
| 59.21                  | 40.2     | 41.03     | 110.3     | 208.2     | 1.515                                 | 2380.242    | 41.35                  | 115.5     | 222.6     | 1.569                                 |
| 59.58                  | 40.8     | 40.98     | 109.9     | 211.3     | 1.549                                 | 2430.864    | 41.42                  | 117.2     | 232.9     | 1.634                                 |
| 59.95                  | 41.2     | 40.05     | 108.6     | 206.2     | 1.531                                 | 2469.94     | 40.86                  | 114.7     | 223.2     | 1.607                                 |
| 60.31                  | 41.6     | 39.26     | 106.2     | 205.2     | 1.563                                 | 2508.896    | 40.88                  | 115.6     | 225.2     | 1.669                                 |
| 60.68                  | 42.2     | 39.01     | 105.3     | 203.3     | 1.543                                 | 2560.696    | 39.89                  | 112.7     | 227.1     | 1.631                                 |
| 61.05                  | 42.6     | 38.8      | 104.7     | 201.3     | 1.552                                 | 2600.73     | 39.54                  | 110.3     | 211.2     | 1.556                                 |
| 61.41                  | 43.2     | 38.34     | 103.39    | 197       | 1.527                                 | 2652.912    | 39.14                  | 110.8     | 222.6     | 1.665                                 |

\*  $D_{v,1}$ ,  $D_{v,5}$ , and  $D_{v,9}$  are the droplet diameters such that 10, 50, and 90 percent, respectively, of the spray volume is in droplets of smaller diameter.  $D_{v,1}$  is the droplet diameter where 10% of the spray volume is contained in droplets smaller than this value.  $D_{v,9}$  is the droplet diameter where 90% of the spray volume is contained in droplets smaller than this value.

Table S3. Test data for an atomizer with a fan blade angle of 55°

| Fan blade angle of 55° |          |               |               |               |                                 |                        |               |               |               |                                 |
|------------------------|----------|---------------|---------------|---------------|---------------------------------|------------------------|---------------|---------------|---------------|---------------------------------|
| Flow rate = 5.0 L/min  |          |               |               |               |                                 | Flow rate = 10.8 L/min |               |               |               |                                 |
| Wind speed<br>$v$      | Traction | $D_{v.1}$     | $D_{v.5}$     | $D_{v.9}$     | Droplet distribution span $R_s$ | Power FV               | $D_{v.1}$     | $D_{v.5}$     | $D_{v.9}$     | Droplet distribution span $R_s$ |
| m/s                    | N        | $\mu\text{m}$ | $\mu\text{m}$ | $\mu\text{m}$ | -                               | W                      | $\mu\text{m}$ | $\mu\text{m}$ | $\mu\text{m}$ | -                               |
| 50.11                  | 29.6     | 75.5          | 181.9         | 335.3         | 1.428                           | 1483.256               | 78.01         | 191.5         | 346.2         | 1.401                           |
| 50.46                  | 30.2     | 74.6          | 178.9         | 321.0         | 1.377                           | 1523.892               | 77.52         | 190.2         | 344.8         | 1.406                           |
| 50.82                  | 30.6     | 72.56         | 175.5         | 315.6         | 1.385                           | 1555.092               | 77.42         | 189           | 343.6         | 1.408                           |
| 51.18                  | 31.0     | 73.19         | 175.4         | 315.0         | 1.379                           | 1586.58                | 76.21         | 187.1         | 340.2         | 1.411                           |
| 51.54                  | 31.4     | 71.01         | 172.1         | 309.3         | 1.384                           | 1618.356               | 75.05         | 184.9         | 337.2         | 1.418                           |
| 51.9                   | 31.8     | 69.42         | 168.6         | 303.8         | 1.390                           | 1650.42                | 74.59         | 182.8         | 332           | 1.408                           |
| 52.27                  | 32.2     | 69.06         | 169.6         | 308.9         | 1.414                           | 1683.094               | 72.73         | 180.2         | 327.7         | 1.419                           |
| 52.63                  | 32.6     | 67.63         | 165.9         | 298.7         | 1.392                           | 1715.738               | 72.30         | 178.8         | 326           | 1.434                           |
| 53.00                  | 33.0     | 68.37         | 166.6         | 300.4         | 1.393                           | 1749                   | 71.57         | 179.1         | 328.4         | 1.427                           |
| 53.37                  | 33.4     | 66.59         | 163.2         | 295.6         | 1.403                           | 1782.558               | 70.71         | 174.9         | 319.4         | 1.454                           |
| 53.73                  | 33.8     | 65.23         | 160.4         | 290.4         | 1.403                           | 1816.074               | 69.32         | 172.8         | 316           | 1.427                           |
| 54.10                  | 34.2     | 65.18         | 160.2         | 292.36        | 1.418                           | 1850.22                | 68.41         | 171.6         | 315.1         | 1.453                           |
| 54.46                  | 34.6     | 64.28         | 157.1         | 284.0         | 1.399                           | 1884.316               | 67.48         | 169.4         | 309.8         | 1.440                           |
| 54.83                  | 35.0     | 63.55         | 155.8         | 283.2         | 1.410                           | 1919.05                | 66.64         | 167.1         | 306.4         | 1.430                           |
| 55.20                  | 35.4     | 62.61         | 154.4         | 280.0         | 1.408                           | 1954.08                | 65.24         | 163.7         | 303.2         | 1.431                           |
| 55.56                  | 35.8     | 62.54         | 153           | 276.4         | 1.398                           | 1989.048               | 64.72         | 162.4         | 298.8         | 1.447                           |
| 55.93                  | 36.2     | 61.46         | 150.9         | 273.6         | 1.405                           | 2024.666               | 63.87         | 160.4         | 300.7         | 1.444                           |
| 56.30                  | 36.6     | 60.51         | 149.6         | 271.2         | 1.409                           | 2060.58                | 62.61         | 157.2         | 294.7         | 1.437                           |
| 56.66                  | 37.0     | 60.21         | 148.5         | 268.9         | 1.405                           | 2096.42                | 62.48         | 156.6         | 287.6         | 1.445                           |
| 57.02                  | 37.4     | 58.52         | 146           | 264.9         | 1.414                           | 2132.548               | 61.11         | 154.8         | 286.5         | 1.440                           |
| 57.39                  | 37.8     | 58.02         | 145.4         | 267.2         | 1.438                           | 2169.342               | 61.03         | 153.9         | 285           | 1.445                           |
| 57.75                  | 38.4     | 57.45         | 143.3         | 260.2         | 1.415                           | 2217.6                 | 60.51         | 152.7         | 283.2         | 1.459                           |
| 58.12                  | 38.8     | 56.81         | 142           | 258.7         | 1.422                           | 2255.056               | 59.21         | 150.5         | 280           | 1.451                           |
| 58.49                  | 39.6     | 56.01         | 140.2         | 254.4         | 1.416                           | 2316.204               | 58.89         | 149.4         | 276.7         | 1.435                           |
| 58.85                  | 40.0     | 54.61         | 138           | 253.4         | 1.441                           | 2354                   | 58.01         | 147.7         | 274           | 1.451                           |
| 59.21                  | 40.4     | 54.54         | 136.8         | 249.3         | 1.423                           | 2392.084               | 57.93         | 157.5         | 271.4         | 1.453                           |
| 59.58                  | 40.4     | 53.82         | 135.6         | 247.6         | 1.428                           | 2407.032               | 56.57         | 144.5         | 273.2         | 1.451                           |
| 59.95                  | 40.8     | 53.26         | 134           | 244.7         | 1.422                           | 2445.96                | 55.47         | 143.1         | 266.1         | 1.454                           |
| 60.31                  | 41.2     | 53.04         | 133.1         | 242.7         | 1.425                           | 2484.772               | 55.22         | 141.6         | 263.7         | 1.427                           |
| 60.68                  | 41.6     | 51.66         | 129.1         | 235.9         | 1.427                           | 2524.288               | 54.10         | 139.4         | 260.8         | 1.451                           |
| 61.05                  | 42.0     | 51.02         | 127.7         | 233.0         | 1.425                           | 2564.1                 | 53.24         | 137.9         | 256.8         | 1.437                           |
| 61.41                  | 42.6     | 51.04         | 129.6         | 236.8         | 1.434                           | 2616.066               | 52.89         | 136.5         | 253.7         | 1.428                           |

\*  $D_{v.1}$ ,  $D_{v.5}$ , and  $D_{v.9}$  are the droplet diameters such that 10, 50, and 90 percent, respectively, of the spray volume is in droplets of smaller diameter.  $D_{v.1}$  is the droplet diameter where 10% of the spray volume is contained in droplets smaller than this value.  $D_{v.9}$  is the droplet diameter where 90% of the spray volume is contained in droplets smaller than this value.

Table S4. Test data for an atomizer with a fan blade angle of 65°

| Fan blade angle of 65° |          |           |           |           |                                 |                        |           |           |           |                                 |
|------------------------|----------|-----------|-----------|-----------|---------------------------------|------------------------|-----------|-----------|-----------|---------------------------------|
| Flow rate = 5.0 L/min  |          |           |           |           |                                 | Flow rate = 10.8 L/min |           |           |           |                                 |
| Wind speed<br>$v$      | Traction | $D_{v,1}$ | $D_{v,5}$ | $D_{v,9}$ | Droplet distribution span $R_s$ | Power FV               | $D_{v,1}$ | $D_{v,5}$ | $D_{v,9}$ | Droplet distribution span $R_s$ |
| m/s                    | N        | μm        | μm        | μm        | -                               | W                      | μm        | μm        | μm        | -                               |
| 50.11                  | 29.6     | 89.45     | 204.8     | 364.6     | 1.343                           | 1483.256               | 91.57     | 216.3     | 390.3     | 1.384                           |
| 50.46                  | 30.0     | 87.63     | 202.3     | 360.1     | 1.346                           | 1513.8                 | 90.20     | 214.9     | 389.0     | 1.391                           |
| 50.82                  | 30.4     | 87.40     | 200.3     | 357.1     | 1.347                           | 1544.928               | 88.89     | 211.5     | 384.0     | 1.395                           |
| 51.18                  | 30.8     | 86.37     | 199.38    | 362.0     | 1.38                            | 1576.344               | 88.17     | 209.8     | 379.7     | 1.368                           |
| 51.54                  | 31.2     | 85.03     | 196.0     | 349.7     | 1.347                           | 1608.048               | 86.58     | 206.1     | 373.8     | 1.394                           |
| 51.90                  | 31.6     | 85.21     | 196.1     | 349.4     | 1.347                           | 1640.04                | 85.05     | 203.3     | 368.6     | 1.395                           |
| 52.27                  | 32.0     | 82.74     | 191.8     | 343.3     | 1.358                           | 1672.64                | 83.86     | 200.6     | 363.8     | 1.396                           |
| 52.63                  | 32.4     | 82.77     | 190.8     | 340.5     | 1.351                           | 1705.212               | 84.12     | 200.6     | 365.5     | 1.403                           |
| 53.00                  | 32.8     | 79.45     | 185.5     | 332.3     | 1.363                           | 1738.4                 | 81.96     | 197.2     | 359.6     | 1.407                           |
| 53.37                  | 33.2     | 81.25     | 187.4     | 334.5     | 1.352                           | 1771.884               | 81.63     | 195.6     | 355.7     | 1.401                           |
| 53.73                  | 33.6     | 78.97     | 184.3     | 330.3     | 1.364                           | 1805.328               | 79.64     | 192.5     | 350.6     | 1.408                           |
| 54.10                  | 34.0     | 78.925    | 183.5     | 328.2     | 1.359                           | 1839.4                 | 79.30     | 190.9     | 347.2     | 1.404                           |
| 54.46                  | 34.4     | 76.40     | 179.9     | 322.7     | 1.369                           | 1873.424               | 77.46     | 187.7     | 341.3     | 1.406                           |
| 54.83                  | 34.8     | 76.70     | 179.7     | 321.9     | 1.365                           | 1908.084               | 75.43     | 180.7     | 325.9     | 1.386                           |
| 55.20                  | 35.2     | 75.27     | 177.0     | 318.2     | 1.370                           | 1943.04                | 75.47     | 184.6     | 336.6     | 1.414                           |
| 55.56                  | 35.6     | 72.85     | 173.8     | 312.9     | 1.381                           | 1977.936               | 74.35     | 182.5     | 333.2     | 1.417                           |
| 55.93                  | 36.0     | 71.41     | 171.0     | 307.9     | 1.383                           | 2013.48                | 73.06     | 180.4     | 329.5     | 1.422                           |
| 56.30                  | 36.6     | 72.11     | 171.0     | 307.9     | 1.379                           | 2060.58                | 72.80     | 179.7     | 328.5     | 1.423                           |
| 56.66                  | 36.8     | 71.38     | 168.5     | 302.7     | 1.373                           | 2085.088               | 71.77     | 177.5     | 324.2     | 1.423                           |
| 57.02                  | 37.2     | 70.33     | 167.2     | 300.8     | 1.378                           | 2121.144               | 71.90     | 178.4     | 333.8     | 1.468                           |
| 57.39                  | 37.6     | 69.58     | 165.7     | 297.7     | 1.376                           | 2157.864               | 70.04     | 173.8     | 317.8     | 1.426                           |
| 57.75                  | 38.2     | 68.57     | 163.6     | 295.0     | 1.384                           | 2206.05                | 69.52     | 172.5     | 316.9     | 1.429                           |
| 58.12                  | 39.0     | 67.13     | 160.8     | 289.6     | 1.383                           | 2266.68                | 68.93     | 172.0     | 315.2     | 1.432                           |
| 58.49                  | 39.4     | 66.77     | 159.8     | 287.4     | 1.380                           | 2304.506               | 67.57     | 169.2     | 310.8     | 1.439                           |
| 58.85                  | 39.6     | 65.51     | 157.6     | 283.8     | 1.385                           | 2330.46                | 66.84     | 168.4     | 308.5     | 1.438                           |
| 59.21                  | 40.0     | 65.90     | 157.5     | 283.1     | 1.379                           | 2368.4                 | 66.04     | 166.8     | 306.6     | 1.439                           |
| 59.58                  | 40.4     | 63.99     | 153.6     | 276.2     | 1.382                           | 2407.032               | 65.17     | 163.4     | 300.1     | 1.442                           |
| 59.95                  | 40.8     | 63.39     | 153.6     | 276.2     | 1.382                           | 2445.96                | 64.28     | 161.7     | 296.6     | 1.438                           |
| 60.31                  | 41.2     | 62.59     | 151.0     | 271.7     | 1.385                           | 2484.772               | 63.97     | 159.1     | 290.7     | 1.437                           |
| 60.68                  | 41.6     | 62.22     | 149.7     | 269.36    | 1.384                           | 2524.288               | 62.27     | 155.6     | 284.4     | 1.425                           |
| 61.05                  | 42.0     | 62.47     | 149.2     | 268.2     | 1.379                           | 2564.1                 | 61.34     | 154.5     | 282.5     | 1.427                           |
| 61.41                  | 42.4     | 61.27     | 147.8     | 266.3     | 1.387                           | 2603.784               | 60.68     | 153.9     | 281.3     | 1.429                           |

\*  $D_{v,1}$ ,  $D_{v,5}$ , and  $D_{v,9}$  are the droplet diameters such that 10, 50, and 90 percent, respectively, of the spray volume is in droplets of smaller diameter.  $D_{v,1}$  is the droplet diameter where 10% of the spray volume is contained in droplets smaller than this value.  $D_{v,9}$  is the droplet diameter where 90% of the spray volume is contained in droplets smaller than this value.

Figure S1. Trend line of droplet size and power at flow rate of 5.0 L/min

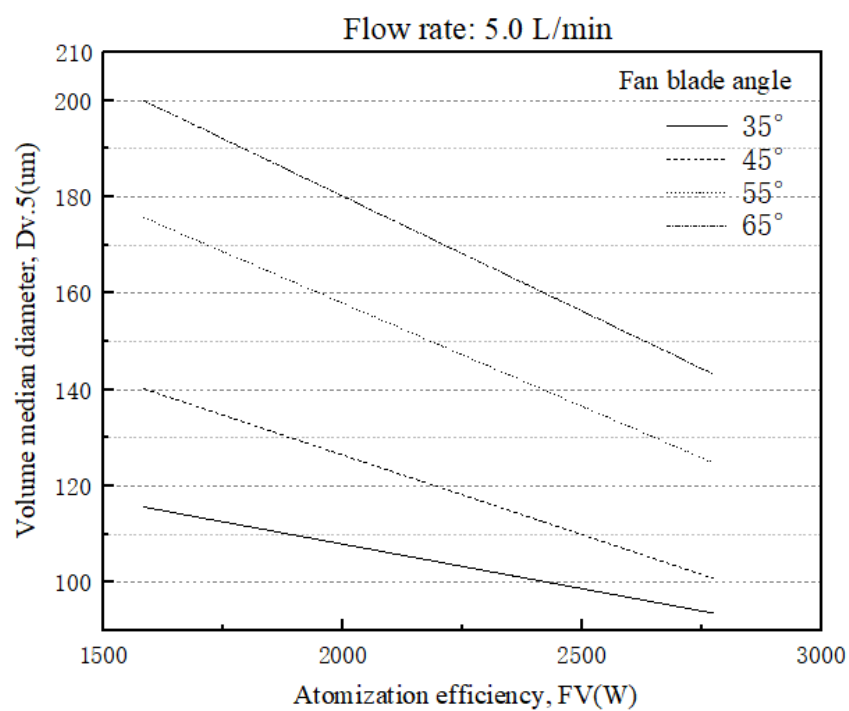

Figure S2. Trend line of droplet size and power at flow rate of 10.8 L/min

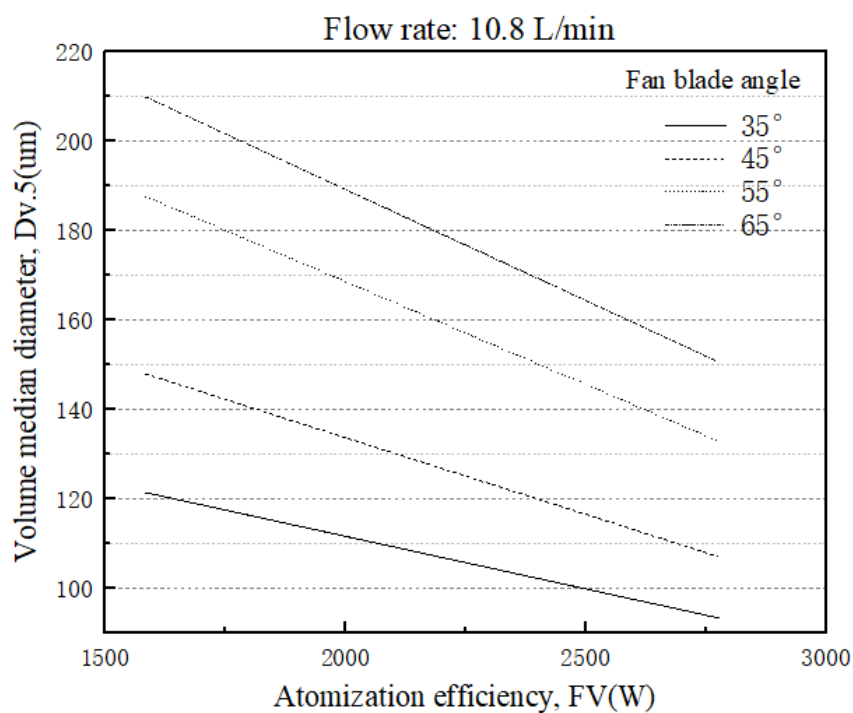

Supplement: s1 [file s1]
